# Supplementary material for: Genotypic and Phenotypic Characterization of&nbsp;Streptococcus Mutans Isolated From Dental Caries
Source: Research Square preprint supplement (doi:10.21203/rs.3.rs-132779/v1), 2020-12-29
Supplement: Supplementary file 1 [file 3bff6bd17b4034700a91bba2.docx]

**Additional Table 1**: List of primers used in this study.

| Name | Purpose | Sequence (5’-3’) |
| --- | --- | --- |
| SMU.479 F | Species-specific PCR | TCGCGAAAAAGATAAACAAACA |
| SMU.479 R | Species-specific PCR | GCCCCTTCACAGTTGGTTAG |
| Opa 2 | AP PCR | TGCCGAGCTG |
| Opa13 | AP PCR | CAGCACCCAC |
| Cnm-1F | Amplification of *cnm* gene | GACAAAGAAATGAAAGATGT |
| Cnm-1 R | Amplification of *cnm* gene | GCAAAGACTCTTGTCCCTGC |
| Cbm F | Amplification of *cbm* gene | GACAAACTAATGAAATCTAA |
| Cbm R | Amplification of *cbm* gene | GCAAAAACTGTTGTCCCTGC |
| nlmA F | Amplification of *nlmA* | ATGGATACACAGGCATTTG |
| nlmA R | Amplification of *nlmA* | ATGAGATCGAATGAGTCC |
| nlmB F | Amplification of *nlmB* | GGAATGGAGAATTAATACC |
| nlmB R | Amplification of *nlmB* | GTGTGGAAAAACTACAGATCC |
| nlmC.F | Amplification of *nlmC* | GATGAATACACAAGCATTTG |
| nlmC.R | Amplification of *nlmC* | CTAACCACAGGAATTAAGAG |
| comC-F | Amplification of *comC* | CCGGATGAAAAAAACACTATCA |
| comC-R | Amplification of *comC* | CCGGTTATTTTCCCAAAGCTTGT |
| ComE-F | Amplification of *comE* | GACGTCTTGAAACCACCATTG |
| ComE-R | Amplification of *comE* | CTTCATTCATTTTGCTCTCCTT |
| comD-F | Amplification of *comD* | GCAATCATATTCTTTATCTTGG |
| comD-R | Amplification of *comD* | GATATTATAACGGGTATCCTG |
| SMU.1906F | Amplification of SMU.1906 | GAATACACACGTATTGGAAC |
| SMU.1906R | Amplification of SMU.1906 | CCTCCAACAAGTTCACCGTA |
| SMU.423 F | Amplification of SMU.423 | GAATACACAAGCATTTGAAC |
| SMU.423R | Amplification of SMU.423 | CAACAAAAAGTAGCAGCACC |
| gtfB F) | Amplification of *gtfB* gene | CTACACTTTCGGGTGGCTTGG |
| gtfB R | Amplification of *gtfB* gene | CAGTATAAGCGCCAGTTTCATC |
| gbpA F | Amplification of *gbpA* gene | ATGATGAAAGAAAAGACACG |
| gbpA R | Amplification of *gbpA* gene | GAAATAGTAATCCATACCATCG |
| vicK F | Amplification of *vicK* gene | GACTAATGTGTTTGAATC |
| vicK R | Amplification of *vicK* gene | CTGGTCTGATTATCAATACGTG |
| CiaH F | Amplification of *ciaH*gene | TAGCAACTGAGAATGTCAATG |
| CiaH R | Amplification of *ciaH*gene | TCAGCAAAGTCTTATCTGTC |
| Gyrase F | Amplification of *gyrA* gene | GCTATGAGTGTTATTGTTGC |
| Gyrase R | Amplification of *gyrA* gene | CATTCCAACAGCAATACCTG |
